# Supplementary material for: Observing hepatic steatosis with a commercially viable two-photon fluorogenic probe
Source: Royal Society of Chemistry journal article supplement (doi:10.1039/d1qm01665b), 2022-01-01
Supplement: d1qm01665b1.pdf [file d1qm01665b1.pdf]

## Observing Hepatic Steatosis with a Commercially Viable Two-Photon Fluorogenic Probe

Jingjing Han,<sup>a#</sup> Hyo Won Lee,<sup>b#</sup> Yahui Chen,<sup>ac</sup> Haidong Li,<sup>d\*</sup> Hwan  
Myung Kim,<sup>b\*</sup> and Juyoung Yoon<sup>a\*</sup>

<sup>a</sup> Department of Chemistry and Nanoscience, Ewha Womans University, Seoul  
03760, Korea. E-mail: [jyoon@ewha.ac.kr](mailto:jyoon@ewha.ac.kr)

<sup>b</sup> Department of Energy Systems Research and Department of Chemistry, Ajou  
University, Suwon, 16499, Korea. E-mail: [kimhm@ajou.ac.kr](mailto:kimhm@ajou.ac.kr)

<sup>c</sup> New and Renewable Energy Research Center, Ewha Womans University, Seoul  
03760, Korea.

<sup>d</sup> School of Bioengineering, Dalian University of Technology Dalian 116024, P.R.  
China, E-mail: [lihd@dlut.edu.cn](mailto:lihd@dlut.edu.cn)

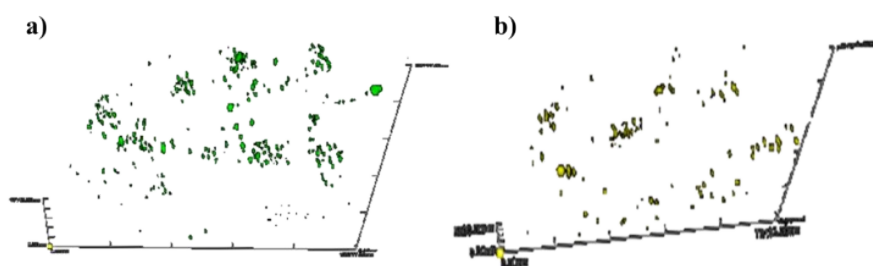

**Figure S1.** 3D Fluorescence images of live HeLa cells for a) DTPC (2  $\mu\text{M}$ ) and b) DQVTA (2  $\mu\text{M}$ ) for three hours.

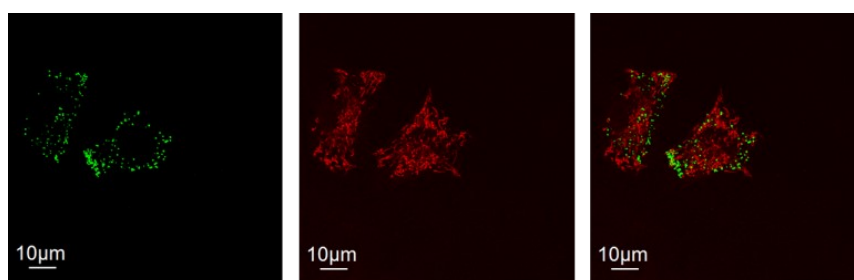

**Figure S2.** Co-localization images of living HeLa cells after incubation with DTPC (3  $\mu\text{M}$ , 3h) and Mito-tracker deep red (0.5  $\mu\text{M}$ , 0.5 h).  $\lambda_{\text{ex}} = 405 \text{ nm}$ ,  $\lambda_{\text{em}} = 490\text{-}590 \text{ nm}$  for DTPC,  $\lambda_{\text{ex}} = 635 \text{ nm}$ ,  $\lambda_{\text{em}} = 655\text{-}750 \text{ nm}$  for Mitotracker deep red.

**Table S1** Two-photon absorption properties of DTPC and DQVTA in different solvent.

| Solvents ( $E_T^N$ )   | DTPC              |                             | DQVTA             |                             |
|------------------------|-------------------|-----------------------------|-------------------|-----------------------------|
|                        | $\Phi\delta$ (GM) | $\lambda_{\text{max}}$ (nm) | $\Phi\delta$ (GM) | $\lambda_{\text{max}}$ (nm) |
| <b>Toluene (0.099)</b> | 72.7              | 760                         | 7.8               | 840                         |
| <b>THF (0.207)</b>     | 42.7              | 760                         | 9.4               | 840                         |
| <b>DMSO (0.444)</b>    | 13.9              | 760                         | 8.7               | 840                         |
| <b>Buffer (1.000)</b>  | 20.1              | 770                         | 4.6               | 750                         |
